# Supplementary material for: Genomic Characteristics of Invasive Mucinous Adenocarcinomas of the Lung and Potential Therapeutic Targets of B7-H3
Source: PubMed Central journal article supplement (PMC6316015; doi:10.3390/cancers10120478), 2018-11-30
Supplement: cancers-10-00478-s001.pdf [file cancers-10-00478-s001.pdf]

## Supplementary Materials: Genomic Characteristics of Invasive Mucinous Adenocarcinomas of the Lung and Potential Therapeutic Targets of B7-H3

Takahiro Nakagomi, Taichiro Goto, Yosuke Hirotsu, Daichi Shikata, Yujiro Yokoyama, Rumi Higuchi, Sotaro Otake, Kenji Amemiya, Toshio Oyama, Hitoshi Mochizuki, and Masao Omata

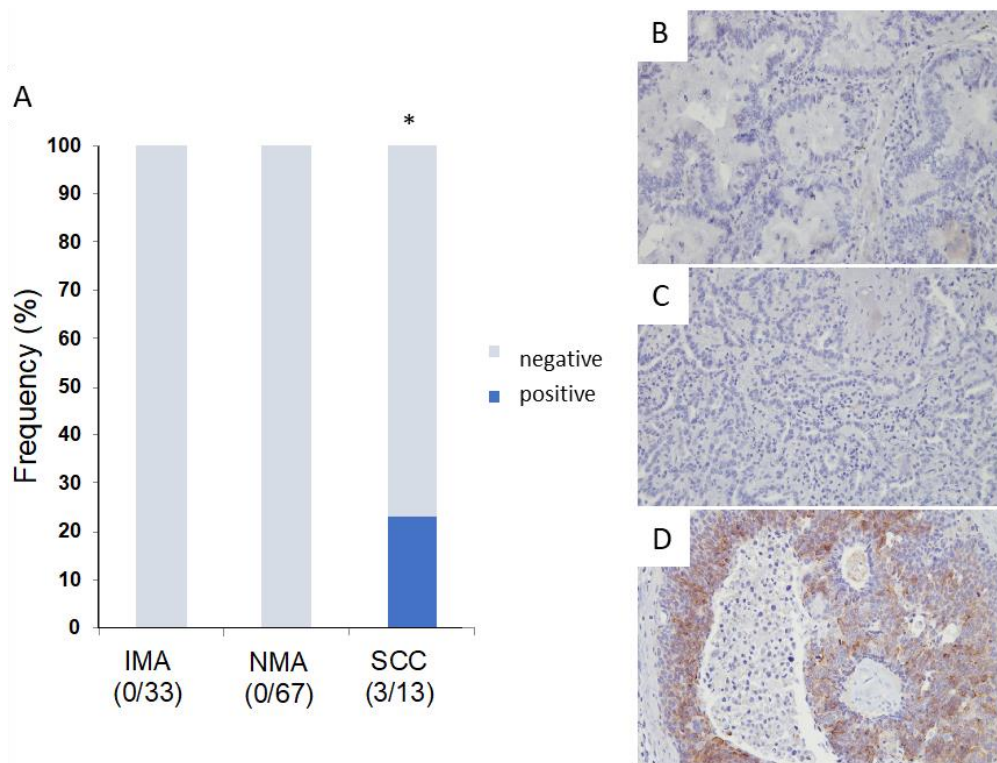

**Figure S1.** Immunostaining for VTCN-1 in IMA, NMA, and squamous cell carcinoma. (A) V-set domain-containing T-cell inhibitor 1 (VTCN1) was detected in some patients with squamous cell carcinoma, but not in patients with invasive mucinous adenocarcinoma (IMA) or nonmucinous adenocarcinoma (NMA). \*,  $p < 0.05$ , compared to IMA or NMA. (B–D) Representative VTCN1 immunostaining in IMA (B), NMA (C), and squamous cell carcinoma (D).

Table S1. Clinical characteristics of the patients.

| Case | Histology | Cluster analysis | Cluster  | Age | sex    | Smoking | Brinkman index | Tumor size(mm) | T-N-M   | p-Stage | Surgical procedure | Adjuvant Tx | Outcome    |
|------|-----------|------------------|----------|-----|--------|---------|----------------|----------------|---------|---------|--------------------|-------------|------------|
| 1    | IMA       | Performed        | B        | 67  | female | never   | 0              | 32             | 2a-0-0  | IB      | lobectomy          | -           | 24m no rec |
| 2    | IMA       | Performed        | B        | 74  | male   | past    | 1080           | 10             | 1a-0-0  | IA1     | lobectomy          | -           | 33m no rec |
| 3    | IMA       | Performed        | C        | 70  | male   | past    | 760            | 22             | 1c-0-0  | IA3     | lobectomy          | -           | 33m no rec |
| 4    | IMA       | Performed        | C        | 74  | female | never   | 0              | 11             | 1b-0-0  | IA2     | wedge resection    | -           | 22m no rec |
| 5    | IMA       | Performed        | C        | 71  | male   | past    | 200            | 11             | 1b-0-0  | IA2     | lobectomy          | -           | 26m no rec |
| 6    | IMA       | Performed        | C        | 83  | female | never   | 0              | 20             | 1b-0-0  | IA2     | lobectomy          | -           | 19m no rec |
| 7    | IMA       | Performed        | C        | 72  | female | never   | 0              | 31             | 2a-0-0  | IB      | lobectomy          | +           | 14m no rec |
| 8    | IMA       | Performed        | C        | 63  | male   | never   | 0              | 80             | 4-0-0   | IIIA    | lobectomy          | +           | 31m no rec |
| 9    | IMA       | Performed        | C        | 49  | female | never   | 0              | 40             | 2a-0-0  | IB      | lobectomy          | +           | 37m no rec |
| 10   | IMA       | Performed        | C        | 70  | male   | past    | 1200           | 10             | 1a-0-0  | IA1     | lobectomy          | -           | 13m no rec |
| 11   | IMA       | Performed        | excluded | 74  | male   | current | 600            | 50             | 2b-0-0  | IIA     | lobectomy          | -           | 33m no rec |
| 12   | IMA       | Performed        | excluded | 76  | male   | past    | 60             | 10             | 1a-0-0  | IA1     | lobectomy          | -           | 14m no rec |
| 13   | IMA       | -                | -        | 77  | female | never   | 0              | 28             | 1c-0-0  | IA3     | lobectomy          | -           | 6m no rec  |
| 14   | IMA       | -                | -        | 73  | male   | past    | 1200           | 60             | 2b-0-0  | IIA     | lobectomy          | +           | 10m no rec |
| 15   | IMA       | -                | -        | 71  | female | never   | 0              | 25             | 1c-0-0  | IA3     | lobectomy          | -           | 36m no rec |
| 16   | IMA       | -                | -        | 68  | male   | past    | 960            | 15             | 1b-0-0  | IA2     | lobectomy          | -           | 20m no rec |
| 17   | IMA       | -                | -        | 90  | male   | past    | 1000           | 30             | 1c-0-0  | IA3     | lobectomy          | -           | 6m death   |
| 18   | IMA       | -                | -        | 84  | female | never   | 0              | 90             | 4-0-0   | IIIA    | lobectomy          | -           | 1m death   |
| 19   | IMA       | -                | -        | 69  | male   | current | 600            | 120            | 4-0-0   | IIIA    | pneumonectomy      | +           | 18m rec    |
| 20   | IMA       | -                | -        | 78  | male   | never   | 0              | 50             | 2a-0-0  | IB      | lobectomy          | +           | 24m no rec |
| 21   | Ad        | Performed        | A        | 67  | male   | past    | 580            | 20             | 2a-0-1a | IV      | lobectomy          | +           | 32m no rec |
| 22   | Ad        | Performed        | A        | 74  | male   | current | 1000           | 35             | 2a-0-0  | IB      | lobectomy          | +           | 9m death   |
| 23   | Ad        | Performed        | A        | 58  | male   | current | 340            | 28             | 1b-2-0  | IIIA    | lobectomy          | +           | 30m no rec |
| 24   | Ad        | Performed        | A        | 49  | male   | past    | 400            | 15             | 1a-0-0  | IA      | lobectomy          | -           | 24m no rec |
| 25   | Ad        | Performed        | A        | 60  | male   | past    | 990            | 12             | 2b-3-0  | IIIB    | wedge resection    | +           | 12m rec    |
| 26   | Ad        | Performed        | A        | 73  | male   | current | 1100           | 20             | 2a-0-0  | IB      | wedge resection    | -           | 15m no rec |
| 27   | Ad        | Performed        | B        | 63  | female | never   | 0              | 25             | 1b-0-0  | IA      | lobectomy          | -           | 34m no rec |
| 28   | Ad        | Performed        | B        | 75  | female | never   | 0              | 20             | 1a-0-0  | IA      | lobectomy          | -           | 32m no rec |
| 29   | Ad        | Performed        | B        | 61  | female | never   | 0              | 14             | 1a-0-0  | IA      | wedge resection    | -           | 17m rec    |
| 30   | Ad        | Performed        | B        | 54  | female | never   | 0              | 16             | 1a-2-0  | IIIA    | lobectomy          | +           | 7m rec     |
| 31   | Ad        | Performed        | B        | 75  | male   | current | 825            | 12             | 1a-0-0  | IA      | lobectomy          | -           | 30m no rec |
| 32   | Ad        | Performed        | B        | 67  | male   | past    | 800            | 32             | 2a-0-0  | IB      | lobectomy          | -           | 1m death   |
| 33   | Ad        | Performed        | B        | 59  | female | past    | 700            | 35             | 2a-0-0  | IB      | lobectomy          | +           | 29m no rec |
| 34   | Ad        | Performed        | B        | 70  | female | never   | 0              | 35             | 2a-0-0  | IB      | lobectomy          | -           | 29m no rec |
| 35   | Ad        | Performed        | B        | 82  | male   | past    | 150            | 20             | 1b-0-0  | IA      | lobectomy          | -           | 27m no rec |
| 36   | Ad        | Performed        | B        | 55  | male   | past    | 700            | 17             | 1a-0-0  | IA      | segmentectomy      | -           | 25m no rec |
| 37   | Ad        | Performed        | B        | 72  | male   | past    | 300            | 10             | 1a-0-0  | IA      | segmentectomy      | -           | 23m no rec |
| 38   | Ad        | Performed        | B        | 72  | male   | past    | 150            | 10             | is-0-0  | 0       | wedge resection    | -           | 23m no rec |
| 39   | Ad        | Performed        | B        | 74  | female | never   | 0              | 8              | 1a-0-0  | IA      | wedge resection    | -           | 22m no rec |
| 40   | Ad        | Performed        | B        | 68  | female | never   | 0              | 10             | 1a-0-0  | IA      | lobectomy          | -           | 24m no rec |
| 41   | Ad        | Performed        | B        | 64  | male   | never   | 0              | 35             | 2a-0-0  | IB      | lobectomy          | +           | 25m no rec |
| 42   | Ad        | Performed        | B        | 63  | male   | past    | 740            | 25             | 1a-0-0  | IA      | lobectomy          | -           | 23m no rec |
| 43   | Ad        | Performed        | B        | 85  | female | never   | 0              | 30             | 2a-0-0  | IB      | lobectomy          | +           | 24m no rec |
| 44   | Ad        | Performed        | B        | 73  | male   | past    | 1800           | 8              | is-0-0  | 0       | pneumonectomy      | +           | 16m no rec |
| 45   | Ad        | Performed        | B        | 78  | male   | past    | 330            | 15             | 1a-0-0  | IA      | lobectomy          | -           | 16m no rec |
| 46   | Ad        | Performed        | B        | 75  | male   | past    | 800            | 17             | is-0-0  | 0       | lobectomy          | -           | 18m no rec |
| 47   | Ad        | Performed        | C        | 77  | male   | current | 1120           | 35             | 2a-0-0  | IB      | lobectomy          | -           | 33m no rec |
| 48   | Ad        | Performed        | C        | 67  | male   | past    | 500            | 15             | 1a-0-0  | IA      | wedge resection    | +           | 32m no rec |
| 49   | Ad        | Performed        | C        | 71  | male   | current | 800            | 10             | 1a-0-0  | IA      | lobectomy          | -           | 2m death   |
| 50   | Ad        | Performed        | C        | 69  | male   | past    | 2520           | 20             | 2a-1-0  | IIA     | lobectomy          | +           | 22m no rec |
| 51   | Ad        | Performed        | Excluded | 63  | female | never   | 0              | 4              | is-0-0  | 0       | wedge resection    | -           | 34m no rec |
| 52   | Ad        | Performed        | Excluded | 59  | female | never   | 0              | 25             | 2a-0-0  | IB      | lobectomy          | -           | 15m rec    |
| 53   | Ad        | Performed        | Excluded | 74  | male   | current | 800            | 10             | 1a-0-0  | IA      | lobectomy          | +           | 32m no rec |
| 54   | Ad        | Performed        | Excluded | 78  | female | never   | 0              | 10             | 1a-0-0  | IA      | lobectomy          | -           | 30m no rec |
| 55   | Ad        | Performed        | Excluded | 64  | female | past    | 172            | 25             | 1a-0-0  | IA      | lobectomy          | -           | 29m no rec |
| 56   | Ad        | Performed        | Excluded | 49  | female | never   | 0              | 15             | 1a-0-0  | IA      | lobectomy          | -           | 29m no rec |
| 57   | Ad        | Performed        | Excluded | 82  | male   | past    | 550            | 25             | 1b-0-0  | IA      | lobectomy          | -           | 27m no rec |
| 58   | Ad        | Performed        | Excluded | 55  | male   | past    | 525            | 32             | 1b-0-0  | IA      | lobectomy          | -           | 25m no rec |
| 59   | Ad        | Performed        | Excluded | 71  | male   | current | 1020           | 30             | 2a-0-0  | IB      | lobectomy          | +           | 4m rec     |
| 60   | Ad        | Performed        | Excluded | 65  | male   | past    | 360            | 25             | 1a-0-0  | IA      | segmentectomy      | -           | 24m no rec |
| 61   | Ad        | Performed        | Excluded | 79  | male   | past    | 1640           | 13             | is-0-0  | 0       | lobectomy          | -           | 13m no rec |
| 62   | Ad        | Performed        | Excluded | 67  | female | never   | 0              | 20             | 1a-0-0  | IA      | lobectomy          | -           | 17m no rec |
| 63   | Ad        | Performed        | Excluded | 67  | female | never   | 0              | 25             | 2a-0-0  | IB      | lobectomy          | -           | 17m no rec |
| 64   | Sq        | Performed        | A        | 68  | male   | past    | 1860           | 20             | 1a-0-0  | IA      | lobectomy          | -           | 32m no rec |
| 65   | Sq        | Performed        | A        | 82  | male   | past    | 1100           | 60             | 2b-1-0  | IIA     | lobectomy          | -           | 24m death  |
| 66   | Sq        | Performed        | A        | 73  | male   | past    | 1800           | 33             | 2a-0-0  | IB      | pneumonectomy      | +           | 16m no rec |
| 67   | Sq        | Performed        | A        | 77  | male   | past    | 675            | 20             | 2b-1-0  | IIIB    | lobectomy          | +           | 14m no rec |
| 68   | Sq        | Performed        | B        | 78  | male   | current | 1700           | 60             | 2a-2-0  | IIIA    | lobectomy          | -           | 11m death  |
| 69   | Sq        | Performed        | C        | 79  | male   | past    | 1640           | 27             | 1b-0-0  | IA      | lobectomy          | -           | 13m no rec |
| 70   | Sq        | Performed        | Excluded | 72  | male   | current | 1500           | 140            | 3-2-0   | IIIA    | lobectomy          | -           | 1m death   |
| 71   | Sq        | Performed        | Excluded | 81  | male   | past    | 870            | 35             | 2a-0-0  | IB      | lobectomy          | -           | 31m no rec |
| 72   | Sq        | Performed        | Excluded | 57  | male   | past    | 1060           | 60             | 2b-1-0  | IIIB    | lobectomy          | +           | 29m no rec |
| 73   | Sq        | Performed        | Excluded | 57  | male   | past    | 1060           | 15             | 2a-0-0  | IB      | wedge resection    | +           | 29m no rec |
| 74   | Sq        | Performed        | Excluded | 79  | female | never   | 0              | 90             | 3-0-0   | IIIB    | lobectomy          | -           | 12m death  |
| 75   | Sq        | Performed        | Excluded | 69  | male   | past    | 920            | 35             | 3-0-0   | IIIB    | lobectomy          | +           | 19m death  |
| 76   | Sq        | Performed        | Excluded | 75  | male   | current | 1080           | 32             | 3-0-0   | IIIB    | lobectomy          | +           | 23m no rec |
| 77   | small     | Performed        | A        | 77  | male   | past    | 675            | 20             | 2a-0-0  | IB      | lobectomy          | +           | 12m rec    |
| 78   | small     | Performed        | Excluded | 64  | male   | past    | 1200           | 35             | 2a-0-0  | IB      | lobectomy          | +           | 29m no rec |
| 79   | small     | Performed        | Excluded | 73  | male   | current | 1100           | 18             | 2a-0-0  | IB      | lobectomy          | -           | 13m no rec |
| 80   | other     | Performed        | Excluded | 68  | male   | past    | 90             | 35             | 2a-0-1a | IV      | lobectomy          | +           | 31m no rec |
| 81   | other     | Performed        | A        | 83  | male   | current | 2520           | 110            | 3-0-0   | IIIB    | lobectomy          | -           | 4m death   |
| 82   | other     | Performed        | A        | 67  | male   | past    | 1800           | 40             | 2a-2-0  | IIIA    | Incisional biopsy  | +           | 2m rec     |
| 83   | other     | Performed        | C        | 54  | male   | current | 600            | 50             | 2a-0-1a | IV      | lobectomy          | +           | 4m death   |
| 84   | other     | Performed        | C        | 78  | female | current | 780            | 47             | 3-0-0   | IIIB    | lobectomy          | -           | 19m no rec |
| 85   | other     | Performed        | Excluded | 60  | female | never   | 0              | 30             | 1b-0-0  | IB      | lobectomy          | -           | 23m rec    |
| 86   | other     | Performed        | A        | 74  | male   | past    | 1350           | 28             | 1b-0-0  | IA      | lobectomy          | -           | 29m death  |

Table S2. Mutations in IMA specimens.

| Patients | Gene    | Function         | Protein      | Position        | Reference | Tumor Variant  | allele fraction | Patients | Gene             | Function              | Protein         | Position       | Reference     | Tumor Variant | allele fraction |
|----------|---------|------------------|--------------|-----------------|-----------|----------------|-----------------|----------|------------------|-----------------------|-----------------|----------------|---------------|---------------|-----------------|
| Case 1   | CTNNB1  | Wnt              | p.Leu427Phe  | chr3:41275113   | C         | T              | 72%             | Case 10  | KRAS             | RTK/RAS/RAF           | p.Gly12Val      | chr12:25398280 | GCCAC         | GCCAC/GCCAA   | 37%             |
|          | TP53    | TP53/ Cell Cycle | p.Gly115Val  | chr17:7578469   | C         | A              | 69%             |          | SMARCA4          | Chromatin             | p.Phe1059Ser    | chr19:11136983 | T             | T/C           | 27%             |
|          | KMT2D   | Epigenetic       | p.Pro3145Ser | chr12:49431706  | G         | A              | 27%             |          | RBM10            | Splicing              | p.Trp936Ter     | chrX:47045731  | G             | G/A           | 21%             |
|          | AKT3    | RTK/RAS/RAF      | p.Trp410Cys  | chr1:243708833  | C         | A              | 26%             |          | COBL             | Other                 | p.Glu481Ala     | chr7:51098571  | T             | T/G           | 20%             |
| Case 2   | SETD2   | Epigenetic       | p.Gln97Ter   | chr3:47165837   | G         | A              | 22%             | RASA1    | RTK/RAS/RAF      | p.Gln1034His          | chr5:86686658   | A              | A/C           | 18%           |                 |
|          | KRAS    | RTK/RAS/RAF      | p.Gly12Val   | chr12:25398284  | C         | A              | 35%             | RASA1    | RTK/RAS/RAF      | p.Gln1035Pro          | chr5:86686660   | A              | A/C           | 17%           |                 |
| Case 3   | ATM     | TP53/ Cell Cycle | p.Leu2629fs  | chr11:108203577 | CTTATA    | C              | 34%             | SMAD4    | TGFb-SMAD        | p.Thr197Ala           | chr18:48581285  | A              | A/G           | 17%           |                 |
|          | U2AF1   | Splicing         | p.Ser34Phe   | chr21:44524456  | G         | G/A            | 33%             | ATM      | TP53/ Cell Cycle | p.Leu942Phe           | chr11:108139322 | C              | C/T           | 17%           |                 |
|          | KRAS    | RTK/RAS/RAF      | p.Gly12Asp   | chr12:25398280  | GCCAC     | GCCAC/GCCAT    | 32%             | MGA      | Transcription    | p.Lys2262Thr          | chr15:42042590  | A              | A/C           | 17%           |                 |
|          | KMT2D   | Epigenetic       | p.Arg2645Ter | chr12:49433620  | G         | G/A            | 6%              | MGA      | Transcription    | p.Phe665Cys           | chr15:41989202  | T              | T/G           | 15%           |                 |
| Case 4   | SOX2    | Transcription    | p.Met294Ile  | chr3:181431030  | G         | G/A            | 4%              | NOTCH2   | NOTCH            | p.Val1686Ala          | chr1:120465015  | A              | A/G           | 15%           |                 |
|          | SMAD4   | TGFb-SMAD        | spliceite_3  | chr18:48591977  | G         | G/A            | 54%             | TSC1     | RTK/RAS/RAF      | p.Leu92Phe            | chr9:135801061  | T              | T/G           | 14%           |                 |
|          | KRAS    | RTK/RAS/RAF      | p.Gly12Arg   | chr12:25398280  | GCCACC    | GCCACC/GCCACG  | 44%             | KMT2A    | Epigenetic       | p.Cys3962Ser          | chr11:18392852  | T              | T/A           | 14%           |                 |
|          | ATM     | TP53/ Cell Cycle | p.Gln201Ter  | chr11:108114784 | C         | C/T            | 40%             | KMT2A    | Epigenetic       | p.Cys3962delinsTrpThr | chr11:18392854  | TGG            | TGG/GAC       | 14%           |                 |
| Case 5   | FGFR3   | RTK/RAS/RAF      | p.Ala636Thr  | chr4:1807841    | G         | G/A            | 12%             | ERBB3    | RTK/RAS/RAF      | p.Asp857Ala           | chr12:56491678  | A              | A/C           | 13%           |                 |
|          | SOX2    | Transcription    | p.Met294Ile  | chr3:181431030  | G         | G/A            | 6%              | TSC1     | RTK/RAS/RAF      | p.Pro362Leu           | chr9:135786445  | G              | G/A           | 13%           |                 |
|          | MGA     | Transcription    | p.Leu28Val   | chr15:41961174  | T         | T/G            | 4%              | ERBB3    | RTK/RAS/RAF      | p.Glu448Asp           | chr12:56487198  | A              | A/C           | 12%           |                 |
|          | KRAS    | RTK/RAS/RAF      | p.Gly12Ala   | chr12:25398280  | GCCAC     | GCCAC/GCCAG    | 35%             | TSC2     | RTK/RAS/RAF      | p.Cys519Ser           | chr16:2114384   | T              | T/A           | 12%           |                 |
| Case 6   | CDKN2A  | TP53/ Cell Cycle | p.Trp15Ter   | chr9:21974782   | C         | C/T            | 26%             | ARID1A   | Chromatin        | p.Asn472Ser           | chr1:27057707   | A              | A/G           | 12%           |                 |
|          | PIK3CA  | RTK/RAS/RAF      | p.His1047Leu | chr3:178952085  | A         | A/T            | 25%             | FGFR2    | RTK/RAS/RAF      | p.Tyr780Cys           | chr10:123239501 | T              | T/C           | 12%           |                 |
|          | FGFR3   | RTK/RAS/RAF      | p.Ala636Thr  | chr4:1807841    | G         | G/A            | 8%              | MET      | RTK/RAS/RAF      | p.Leu90fs             | chr7:116339405  | GC             | GC/G          | 11%           |                 |
|          | PIK3CA  | RTK/RAS/RAF      | p.His1047Leu | chr3:178952085  | A         | A/T            | 39%             | COBL     | Other            | p.Gln1004Lys          | chr7:51095783   | G              | G/T           | 11%           |                 |
| Case 7   | NFE2L2  | Oxidative        | p.Leu30Phe   | chr2:178098957  | G         | G/A            | 18%             | KMT2D    | Epigenetic       | p.Val4078Ala          | chr12:49426255  | A              | A/G           | 10%           |                 |
|          | KRAS    | RTK/RAS/RAF      | p.Gly12Asp   | chr12:25398280  | GCCAC     | GCCAC/GCCAT    | 18%             | KMT2D    | Epigenetic       | p.Val4078fs           | chr12:49426258  | AG             | AG/A          | 10%           |                 |
|          | MAP2K1  | RTK/RAS/RAF      | p.Lys168Arg  | chr15:66735682  | A         | A/G            | 11%             | EP300    | Transcription    | p.Met1989Thr          | chr22:41573681  | T              | T/C           | 10%           |                 |
|          | TP53    | TP53/ Cell Cycle | p.Arg280Thr  | chr17:7577094   | GGTCTCT   | GTCTCT/GGTCTCG | 9%              | KMT2A    | Epigenetic       | p.Glu970Gly           | chr11:18344783  | A              | A/G           | 7%            |                 |
| Case 8   | ATM     | TP53/ Cell Cycle | p.Glu953Lys  | chr11:108141809 | G         | G/A            | 8%              | COBL     | Other            | p.Thr403Lys           | chr7:51111278   | G              | G/T           | 6%            |                 |
|          | NOTCH2  | NOTCH            | p.Leu1689Phe | chr1:120465007  | T         | T/A            | 7%              | NOTCH2   | NOTCH            | p.Ala862Val           | chr1:120491644  | G              | G/A           | 6%            |                 |
|          | KMT2D   | Epigenetic       | p.Asp632Glu  | chr12:49445570  | G         | G/C            | 6%              | EPHA7    | Other            | p.Asp356Glu           | chr6:94066691   | G              | G/C           | 5%            |                 |
|          | MGA     | Transcription    | p.Arg3038Trp | chr15:42059392  | C         | C/T            | 5%              | KMT2D    | Epigenetic       | p.Thr5101Asn          | chr12:49420447  | G              | G/T           | 5%            |                 |
| Case 9   | STK11   | RTK/RAS/RAF      | p.Pro221Leu  | chr19:1220644   | C         | C/T            | 37%             | SETD2    | Epigenetic       | p.Asp699Asn           | chr3:47164031   | C              | C/T           | 5%            |                 |
|          | NOTCH1  | NOTCH            | p.Glu794Ter  | chr9:139407560  | C         | C/A            | 5%              | ARID2    | Chromatin        | p.Met877Ile           | chr12:46244537  | G              | G/A           | 5%            |                 |
| Case 10  | CUL3    | Oxidative        | p.Ser585Cys  | chr2:225360637  | G         | G/C            | 23%             | MAP2K1   | RTK/RAS/RAF      | p.Gly77Ala            | chr15:66727514  | G              | G/C           | 4%            |                 |
|          | KRAS    | RTK/RAS/RAF      | p.Gly12Asp   | chr12:25398280  | GCCAC     | GCCAC/GCCAT    | 23%             | KMT2D    | Epigenetic       | p.Ala5100Pro          | chr12:49420451  | C              | C/G           | 4%            |                 |
|          | NOTCH1  | NOTCH            | p.Gly1434Ser | chr9:139400048  | C         | C/T            | 5%              | SETD2    | Epigenetic       | p.Arg620Ter           | chr3:47164268   | G              | G/A           | 4%            |                 |
|          | KRAS    | RTK/RAS/RAF      | p.Gly12Cys   | chr12:25398280  | GCCACC    | GCCACC/GCCACA  | 71%             | Case 11  | KRAS             | RTK/RAS/RAF           | p.Gly12Cys      | chr12:25398280 | GCCACC        | GCCACC/GCCACA | 56%             |
| Case 9   | EGFR    | RTK/RAS/RAF      | p.Ala16Val   | chr7:55087017   | C         | C/T            | 23%             | Case 12  | KMT2A            | Epigenetic            | p.Cys3962Ser    | chr11:18392852 | T             | T/A           | 4%              |
|          | ARID1A  | Chromatin        | p.Trp1844Ter | chr1:27105920   | G         | G/A            | 22%             | Case 13  | ERBB2            | RTK/RAS/RAF           | p.Trp614Arg     | chr17:37873675 | T             | T/C           | 5%              |
|          | AKT1    | RTK/RAS/RAF      | p.Cys296Gly  | chr14:105239659 | A         | A/C            | 8%              | Case 14  | KRAS             | RTK/RAS/RAF           | p.Gly12Val      | chr12:25398280 | GCCAC         | GCCAC/GCCAA   | 18%             |
|          | FGFR3   | RTK/RAS/RAF      | p.Gly192Asp  | chr4:1803223    | G         | G/A            | 6%              | Case 15  | MGA              | Transcription         | p.Met1236Ile    | chr15:42021412 | G             | G/A           | 4%              |
|          | KMT2D   | Epigenetic       | p.Asp1749Glu | chr12:49437723  | A         | A/C            | 6%              | Case 16  | U2AF1            | Splicing              | p.Ser34Phe      | chr2:144524456 | G             | G/A           | 29%             |
|          | SMARCA4 | Chromatin        | p.Leu724Phe  | chr19:11121103  | C         | C/T            | 4%              | Case 17  | KRAS             | RTK/RAS/RAF           | p.Gly12Asp      | chr12:25398280 | GCCAC         | GCCAC/GCCAT   | 26%             |
|          | TSC2    | RTK/RAS/RAF      | p.Ala1238Thr | chr16:2131697   | G         | G/A            | 4%              | Case 18  | SMAD4            | TGFb-SMAD             | p.Pro298Ser     | chr18:48584814 | C             | C/T           | 24%             |
|          | KRAS    | RTK/RAS/RAF      | p.Gly12Cys   | chr12:25398280  | GCCACC    | GCCACC/GCCACA  | 56%             | RBM10    | Splicing         | p.Arg831Leu           | chrX:47044971   | G              | G/T           | 77%           |                 |
|          | TP63    | NOTCH            | p.Ser38Ala   | chr3:189455578  | T         | T/G            | 32%             | KEAP1    | Oxidative        | p.Glu149Lys           | chr19:10610265  | C              | C/T           | 71%           |                 |
|          | ARID1A  | Chromatin        | p.Trp1844Ter | chr1:27105920   | G         | G/A            | 19%             | KRAS     | RTK/RAS/RAF      | p.Gly12Cys            | chr12:25398280  | GCCACC         | GCCACC/GCCACA | 66%           |                 |
| Case 11  | KMT2D   | Epigenetic       | p.Thr2314Ile | chr12:49434612  | G         | G/A            | 4%              | Case 19  | ARID1A           | Chromatin             | p.Gly1469fs     | chr1:27101116  | A             | A/AC          | 38%             |
|          | STK11   | RTK/RAS/RAF      | p.Trp15Ter   | chr9:21974782   | C         | C/T            | 26%             | Case 20  | STK11            | RTK/RAS/RAF           | p.Arg297Ser     | chr19:1221976  | G             | G/T           | 28%             |
|          | SMARCA4 | Chromatin        | p.Phe1059Ser | chr19:11136983  | T         | T/C            | 4%              | Case 20  | KRAS             | RTK/RAS/RAF           | p.Gly12Val      | chr12:25398280 | GCCAC         | GCCAC/GCCAA   | 19%             |
|          | KRAS    | RTK/RAS/RAF      | p.Gly12Asp   | chr12:25398280  | GCCAC     | GCCAC/GCCAT    | 72%             | Case 20  | SMARCA4          | Chromatin             | p.Phe1059Ser    | chr19:11136983 | T             | T/C           | 4%              |
| Case 12  | ATM     | TP53/ Cell Cycle | p.Leu2544Pro | chr11:108202607 | T         | T/C            | 59%             | Case 20  | KRAS             | RTK/RAS/RAF           | p.Gly12Asp      | chr12:25398280 | GCCAC         | GCCAC/GCCAT   | 29%             |
|          | KRAS    | RTK/RAS/RAF      | p.Gly12Asp   | chr12:25398280  | GCCAC     | GCCAC/GCCAT    | 29%             | Case 20  | PIK3CA           | RTK/RAS/RAF           | p.Asn370Ser     | chr3:178922340 | A             | A/G           | 21%             |
|          | PIK3CA  | RTK/RAS/RAF      | p.Asn370Ser  | chr3:178922340  | A         | A/G            | 21%             | Case 20  | KMT2D            | Epigenetic            | p.Asp2622Asn    | chr12:49433689 | C             | C/T           | 14%             |
|          | SOX2    | Transcription    | p.Ser295Phe  | chr3:181431032  | C         | C/T            | 5%              | Case 20  | SOX2             | Transcription         | p.Ser295Phe     | chr3:181431032 | C             | C/T           | 5%              |
| Case 13  | SOX2    | Transcription    | p.Met294Ile  | chr3:181431030  | G         | G/A            | 4%              | Case 20  | SOX2             | Transcription         | p.Met294Ile     | chr3:181431030 | G             | G/A           | 4%              |

Table S3. Pathways affected in IMA and NMA by mutations with allele fractions  $\geq 20\%$ .

| Pathway          | IMA (n=20) | NMA (n=43) | p value |
|------------------|------------|------------|---------|
| RTK/RAS/RAF      | 16 (80.0%) | 30 (69.8%) | 0.394   |
| TP53/ Cell Cycle | 5 (25.0%)  | 15 (34.9%) | 0.433   |
| Transcription    | 0 (0.0%)   | 3 (7.0%)   | 0.226   |
| NOTCH            | 0 (0.0%)   | 3 (7.0%)   | 0.226   |
| Epigenetic       | 1 (5.0%)   | 1 (2.3%)   | 0.573   |
| Oxidative        | 3 (15.0%)  | 4 (9.3%)   | 0.503   |
| Chromatin        | 3 (15.0%)  | 1 (2.3%)   | 0.055   |
| Splicing         | 4 (20.0%)  | 7 (16.3%)  | 0.717   |
| Wnt              | 1 (5.0%)   | 0 (0.0%)   | 0.139   |
| TGFb-SMAD        | 3 (15.0%)  | 2 (4.7%)   | 0.157   |
| Axon guidance    | 0 (0.0%)   | 1 (2.3%)   | 0.492   |
| Other            | 0 (0.0%)   | 1 (2.3%)   | 0.492   |

Table S4. Sequencing targets.

| No | Gene symbol | Chromosome | Number of Amplicons | Total Bases | Covered Bases | Overall Coverage |
|----|-------------|------------|---------------------|-------------|---------------|------------------|
| 1  | AKT1        | chr14      | 26                  | 1573        | 1497          | 95%              |
| 2  | AKT2        | chr19      | 27                  | 1576        | 1543          | 98%              |
| 3  | AKT3        | chr1       | 30                  | 1624        | 1624          | 100%             |
| 4  | ARID1A      | chr1       | 76                  | 7058        | 6023          | 85%              |
| 5  | ARID1B      | chr6       | 75                  | 6950        | 5965          | 86%              |
| 6  | ARID2       | chr12      | 71                  | 5718        | 5643          | 99%              |
| 7  | ASCL4       | chr12      | 5                   | 532         | 382           | 72%              |
| 8  | ATM         | chr11      | 147                 | 9791        | 9439          | 96%              |
| 9  | BRAF        | chr7       | 37                  | 2481        | 2224          | 90%              |
| 10 | CDKN2A      | chr9       | 9                   | 962         | 612           | 64%              |
| 11 | COBL        | chr7       | 48                  | 4151        | 3977          | 96%              |
| 12 | CREBBP      | chr16      | 96                  | 7639        | 7071          | 93%              |
| 13 | CTNNB1      | chr3       | 32                  | 2486        | 2486          | 100%             |
| 14 | CUL3        | chr2       | 42                  | 2561        | 2495          | 97%              |
| 15 | EGFR        | chr7       | 60                  | 4189        | 4135          | 99%              |
| 16 | EP300       | chr22      | 90                  | 7555        | 7182          | 95%              |
| 17 | EPHA7       | chr6       | 44                  | 3175        | 3154          | 99%              |
| 18 | ERBB2       | chr17      | 57                  | 4080        | 3808          | 93%              |
| 19 | ERBB3       | chr12      | 59                  | 4440        | 4374          | 99%              |
| 20 | FGFR1       | chr8       | 41                  | 2825        | 2816          | 100%             |
| 21 | FGFR2       | chr10      | 43                  | 2910        | 2842          | 98%              |
| 22 | FGFR3       | chr4       | 34                  | 2752        | 2215          | 81%              |
| 23 | FOXP2       | chr7       | 36                  | 2487        | 2469          | 99%              |
| 24 | HRAS        | chr11      | 11                  | 683         | 683           | 100%             |
| 25 | KEAP1       | chr19      | 24                  | 1925        | 1845          | 96%              |
| 26 | KMT2D       | chr12      | 192                 | 17154       | 15854         | 92%              |
| 27 | KRAS        | chr12      | 10                  | 737         | 681           | 92%              |
| 28 | MAP2K1      | chr15      | 18                  | 1292        | 1239          | 96%              |
| 29 | MET         | chr7       | 59                  | 4427        | 4396          | 99%              |
| 30 | MGA         | chr15      | 110                 | 9428        | 9345          | 99%              |
| 31 | MLL         | chr11      | 144                 | 12279       | 11875         | 97%              |
| 32 | NF1         | chr17      | 136                 | 9161        | 9023          | 99%              |
| 33 | NFE2L2      | chr2       | 23                  | 1868        | 1826          | 98%              |
| 34 | NOTCH1      | chr9       | 99                  | 8008        | 7078          | 88%              |
| 35 | NOTCH2      | chr1       | 101                 | 7809        | 7539          | 97%              |
| 36 | NRAS        | chr1       | 9                   | 610         | 610           | 100%             |
| 37 | PIK3CA      | chr3       | 50                  | 3407        | 3282          | 96%              |
| 38 | PTEN        | chr10      | 18                  | 1302        | 1223          | 94%              |
| 39 | RASA1       | chr5       | 55                  | 3412        | 3216          | 94%              |
| 40 | RB1         | chr13      | 55                  | 3057        | 2902          | 95%              |
| 41 | RBM10       | chrX       | 48                  | 3228        | 3079          | 95%              |
| 42 | RIT1        | chr1       | 13                  | 771         | 771           | 100%             |
| 43 | SETD2       | chr3       | 91                  | 7905        | 7663          | 97%              |
| 44 | SLIT2       | chr4       | 76                  | 4972        | 4854          | 98%              |
| 45 | SMAD4       | chr18      | 24                  | 1769        | 1715          | 97%              |
| 46 | SMARCA4     | chr19      | 74                  | 5399        | 5055          | 94%              |
| 47 | SOX2        | chr3       | 9                   | 964         | 883           | 92%              |
| 48 | STK11       | chr19      | 23                  | 1392        | 1343          | 97%              |
| 49 | TP53        | chr17      | 22                  | 1383        | 1351          | 98%              |
| 50 | TP63        | chr3       | 34                  | 2360        | 2227          | 94%              |

|    |       |       |    |      |      |     |
|----|-------|-------|----|------|------|-----|
| 51 | TSC1  | chr9  | 49 | 3705 | 3603 | 97% |
| 52 | TSC2  | chr16 | 92 | 5834 | 5677 | 97% |
| 53 | U2AF1 | chr21 | 15 | 880  | 870  | 99% |

---

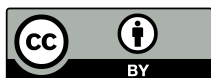

© 2018 by the authors. Licensee MDPI, Basel, Switzerland. This article is an open access article distributed under the terms and conditions of the Creative Commons Attribution (CC BY) license (<http://creativecommons.org/licenses/by/4.0/>).
